# Supplementary material for: Flexible and scalable diagnostic filtering of genomic variants using G2P with Ensembl VEP
Source: PubMed Central journal article supplement (PMC6542828; doi:10.1038/s41467-019-10016-3), 2019-05-30
Supplement: 41467_2019_10016_MOESM3_ESM.pdf [file 41467_2019_10016_MOESM3_ESM.pdf]

## Description File for Additional Supplementary Data

File Name: Supplementary Data 1

Description: Summary of January 2018 Freeze of G2PDD dataset

File Name: Supplementary Data 2

Description: Summary of January 2018 Freeze of G2PCancer dataset

File Name: Supplementary Data 3

Description: Per gene assessment of background noise in G2P-DD

File Name: Supplementary Data 4

Description: Per gene assessment of background noise in G2P-Cancer
